# Supplementary material for: Distribution and features of hematological malignancies in Eastern Morocco: a retrospective multicenter study over 5 years
Source: Springer Nature journal article supplement (doi:10.1186/s12885-016-2205-5), 2016-02-25
Supplement: MOESM1 [file 9746188]

**Table S1: Distribution and male to female ratio (M/F) of hematological malignancies by age group in Eastern Morocco, 2008-2012**

| Age group (Year) | MPN (n) % | AML (n) % | MDS (n) % | NHL (n) % | HL (n) %  | MM (n) %  | CLL (n) % | ALL (n) % | WM (n) % | Others (n) % | Total (n) % | H/F |
|------------------|-----------|-----------|-----------|-----------|-----------|-----------|-----------|-----------|----------|--------------|-------------|-----|
| 0-14             | (0) 0     | (0) 0     | (0) 0     | (1) 16.7  | (5) 83.3  | (0) 0     | (0) 0     | (0) 0     | (0) 0    | (0) 0        | (6) 100     |     |
| 15-19            | (2) 4.4   | (3) 6.7   | (1) 2.2   | (14) 31.1 | (15) 33.3 | (1) 2.2   | (0) 0     | (1) 2.2   | (0) 0    | (8) 17.8     | (45) 100    |     |
| <b>Under 20</b>  | (2) 3.9   | (3) 5.9   | (1) 2     | (15) 29.4 | (20) 39.2 | (1) 2     | (0) 0     | (1) 2     | (0) 0    | (8) 15.7     | (51) 100    | 1.8 |
| 20-29            | (8) 12.7  | (6) 9.5   | (0) 0     | (12) 19   | (23) 36.5 | (1) 1.6   | (0) 0     | (2) 3.2   | (1) 1.6  | (10) 15.9    | (63) 100    |     |
| 30-39            | (8) 14.3  | (4) 7.1   | (1) 1.8   | (10) 17.9 | (15) 26.8 | (4) 7.1   | (2) 3.6   | (3) 5.4   | (0) 0    | (9) 16.1     | (56) 100    |     |
| <b>20- 39</b>    | (16) 13.4 | (10) 8.4  | (1) 0.8   | (22) 18.5 | 38) 31.9  | (5) 4.2   | (2) 1.7   | (5) 4.2   | (1) 0.8  | (19) 16      | (119) 100   | 1.2 |
| 40-49            | (18) 17.8 | (6) 5.9   | (0) 0     | (36) 35.6 | (13) 12.9 | (10) 9.9  | (4) 4     | (4) 4     | (2) 2    | (8) 7,9      | (101) 100   |     |
| 50-59            | (19) 16.2 | (4) 3.4   | (6) 5.1   | (43) 36.8 | (8) 6.8   | (16) 13.7 | (7) 6     | (0) 0     | (0) 0    | (14) 12      | (117) 100   |     |
| <b>40-59</b>     | (37) 17.0 | (10) 4.6  | (6) 2.8   | (79) 36.2 | (21) 9.6  | (26) 11.9 | (11) 5    | (4) 1.8   | (2) 0.9  | (22) 10.1    | (218) 100   | 1.3 |
| 60-69            | (14) 12   | (4) 3.4   | (4) 3.4   | (33) 28.2 | (13) 11.1 | (25) 21.4 | (8) 6.8   | (2) 1.7   | (0) 0    | (14) 12      | (117) 100   |     |
| 70+              | (15) 10.3 | (5) 3.4   | (8) 5.5   | (44) 30.1 | (11) 7.5  | (25) 17.1 | (17)11.6  | (4) 2.7   | (1) 0.7  | (16) 11      | (146) 100   |     |
| <b>60 +</b>      | (29) 11   | (9) 3.4   | (12) 4.6  | (77) 29.3 | (24) 9.1  | (50) 19   | (25) 9.5  | (6) 2.3   | (1) 0.4  | (30) 11.4    | (263) 100   | 0.9 |

Among the 660 registered cases of hematological malignancies, the age at diagnosis was available for only 651 cases (the age was missing for 3 cases NHL, 2 cases HL and 4 cases in others category); others: other lymphoid neoplasms and unspecified hematological malignancies; M/F: male to female ratio

**Table S2: Age-group specific distribution of hematological malignancies in Eastern Morocco, 2008-2012**

| <b>Age group (Year)</b> | <b>MPN (n) %</b> | <b>AML (n) %</b> | <b>MDS (n) %</b> | <b>NHL (n) %</b> | <b>HL (n) %</b> | <b>MM (n) %</b> | <b>CLL (n) %</b> | <b>ALL (n) %</b> | <b>WM (n) %</b> | <b>Others (n) %</b> |
|-------------------------|------------------|------------------|------------------|------------------|-----------------|-----------------|------------------|------------------|-----------------|---------------------|
| 0-14                    | (0) 0            | (0) 0            | (0) 0            | (1) 0.5          | (5) 4.9         | (0) 0           | (0) 0            | (0) 0            | (0) 0           | (0) 0               |
| 15-19                   | (2) 2.4          | (3) 9.4          | (1) 5            | (14) 7.3         | (15) 14.6       | (1) 1.2         | (0) 0            | (1) 6.3          | (0) 0           | (8) 10.1            |
| <b>Under 20</b>         | (2) 2.4          | (3) 9.4          | (1) 5            | (15) 7.8         | (20) 19.4       | (1) 1.2         | (0) 0            | (1) 6.3          | (0) 0           | (8) 10.1            |
| 20-29                   | (8) 9.5          | (6) 18.8         | (0) 0            | (12) 6.2         | (23) 22.3       | (1) 1.2         | (0) 0            | (2) 12.5         | (1) 25          | (10) 12.7           |
| 30-39                   | (8) 9.5          | (4) 12.5         | (1) 5            | (10) 5.2         | (15) 14.6       | (4) 4.9         | (2) 5.3          | (3) 18.8         | (0) 0           | (9) 11.4            |
| <b>20- 39</b>           | (16) 19          | (10) 31.3        | (1) 5            | (22) 11.4        | (38) 36.9       | (5) 6.1         | (2) 5.3          | (5) 31.3         | (1) 25          | (19) 24.1           |
| 40-49                   | (18) 21.4        | (6) 18.8         | (0) 0            | (36) 18.7        | (13) 12.6       | (10) 12.2       | (4) 10.53        | (4) 25           | (2) 50          | (8) 10.1            |
| 50-59                   | (19) 22.6        | (4) 12.5         | (6) 30           | (43) 22.3        | (8) 7.8         | (16) 19.5       | (7) 18.4         | (0) 0            | (0) 0           | (14) 17.7           |
| <b>40-59</b>            | (37) 44          | (10) 31.3        | (6) 30           | (79) 40.9        | (21) 20.4       | (26) 31.7       | (11) 28.9        | (4) 25           | (2) 50          | (22) 27.8           |
| 60-69                   | (14) 16.7        | (4) 12.5         | (4) 20           | (33) 17.1        | (13) 12.6       | (25) 30.5       | (8) 21.1         | (2) 12.5         | (0) 0           | (14) 17.7           |
| 70+                     | (15) 17.9        | (5) 15.6         | (8) 40           | (44) 22.8        | (11) 10.7       | (25) 30.5       | (17) 44.7        | (4) 25           | (1) 25          | (16) 20.3           |
| <b>60 +</b>             | (29) 34.5        | (9) 28.1         | (12) 60          | (77) 39.9        | (24) 23.3       | (50) 61.0       | (25) 65.8        | (6) 37.5         | (1) 25          | (30) 38             |
| <b>Total</b>            | (84) 100         | (32) 100         | (20) 100         | (193) 100        | (103) 100       | (82) 100        | (38) 100         | (16) 100         | (4) 100         | 79 (100)            |

Among the 660 registered cases of hematological malignancies, the age at diagnosis was available for only 651 cases (the age was missing for 3 cases NHL, 2 cases HL and 4 cases in others category); others: other lymphoid neoplasms and unspecified hematological malignancies
